# Supplementary material
Source: publisher figshare collection journal article supplement (https://acs.figshare.com/ndownloader/files/25911063)
Supplement: Supplementary file 1 [file 25911063]

# Systematic Design and Validation of Ion Channel Stabilization of Amphipathic $\alpha$ -Helical Peptides incorporating Tryptophan Residues

*Keita Shigedomi<sup>1</sup>, Satoshi Osada<sup>1\*</sup>, Masoud Jelokhani-Niaraki<sup>2</sup>, Hiroaki Kodama<sup>1</sup>*

<sup>1</sup>Department of Chemistry and Applied Chemistry, Faculty of Science and Engineering, Saga

University, Saga 840–8502, Japan

<sup>2</sup>Department of Chemistry, Faculty of Science, Wilfrid Laurier University, Waterloo, Ontario N2L

3C5, Canada

Supporting Information Content Two Supporting Figures -

Figure S1: Near-UV CD spectra of BKBA20 and Trp-containing analogs.

Figure S2: Lipid solubilization assay.

## **Lipid solubilization assay.**

DPPC (4.4 mmol) was dissolved in 100 mL of chloroform. The chloroform stock solutions were then evaporated into thin films using a nitrogen stream and further dried in vacuo overnight. The thin lipid film was then suspended in 1 mL of 50 mM phosphate buffer (pH 7.4) and vortexed for 30 min at 60°C. LUVs were prepared using a LiposoFast extruder (Avestin, Canada) through a 100 nm filter<sup>41</sup>. Lipid dispersions were passed through a filter for a total of 21 times. The solutions were mixed at 200  $\mu$ M peptide concentration and 1 mM DPPC concentration to give P/L ratios of 1/5 and incubated at 25°C. The kinetics of DPPC solubilization were measured by UV absorbance at 595 nm every 2 mins for 30 minutes on Model 680XR microplate reader (Bio-Rad).

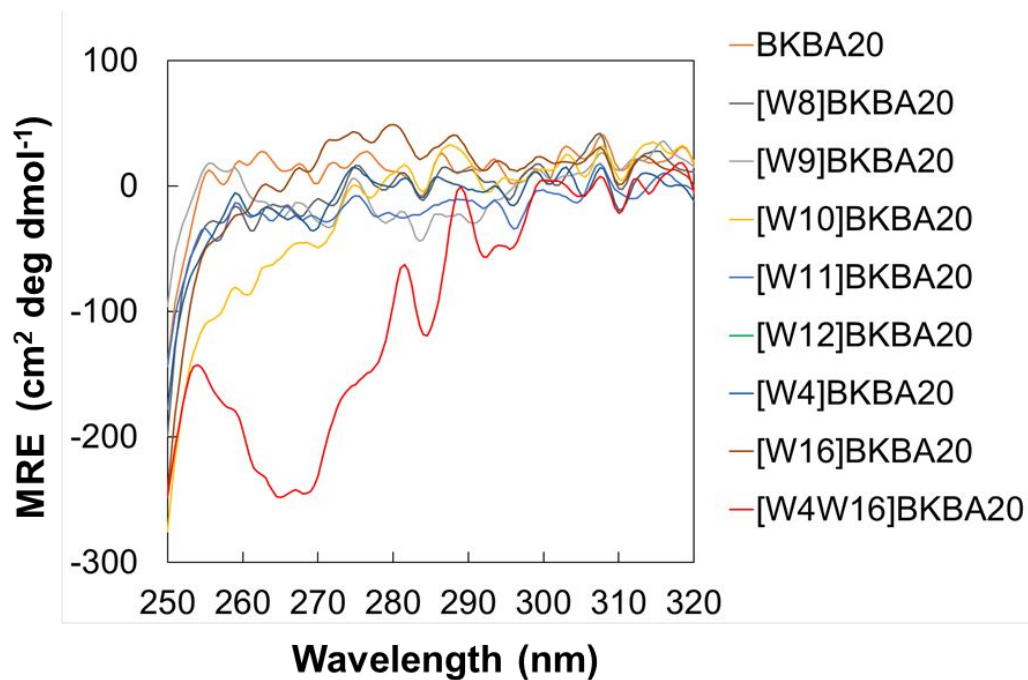

Figure S1. Near-UV CD spectra of BKBA20 and Trp-containing analogs in 50 mM phosphate buffer (pH 7.4). [W4W16]BKBA20 indicated the characteristic CD band in the 255-290 nm range, corresponding to the  $L_a$  and  $L_b$  bands of the Trp, which is sensitive to the environment.

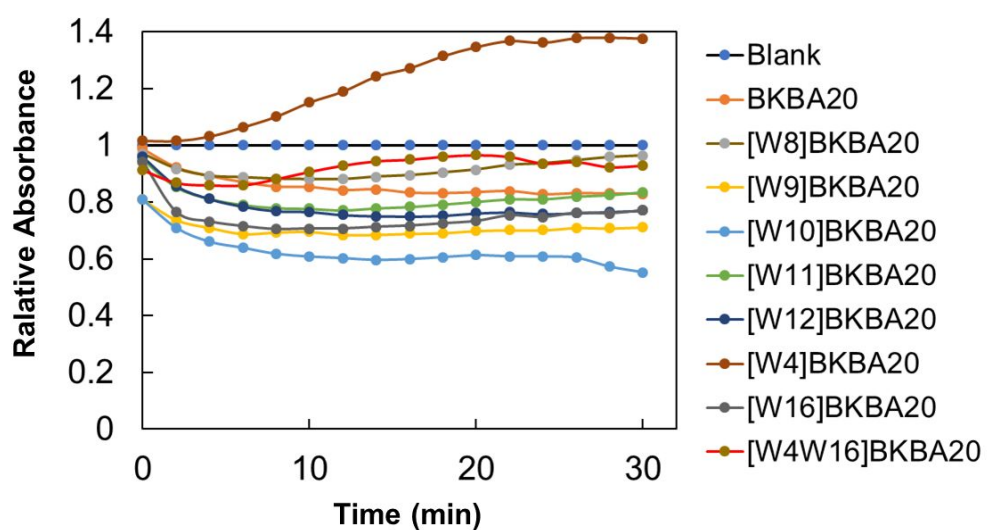

Figure S2. Lipid solubilization assay. BKBA20 and Trp-containing analogs dissolved in 50 mM phosphate buffer and mixed with DPPC LUVs. Turbidity was monitored by measuring the absorption at 595 nm every 2 minutes for 30 min. The peptide and DPPC concentrations were 200  $\mu$ M and 1 mM, respectively, to give the P/L ratios of 1/5.
